# Supplementary material
Source: PubMed Central journal article supplement (PMC8136479)
Supplement: 41386_2020_927_MOESM3_ESM.pdf [file 41386_2020_927_MOESM3_ESM.pdf]

Table S3

| RefSeq       | Gene name                                       | Gene title    | CPu-Morphine/Vehicle |      |                    | CPu-Vehicle/VU0155041 |             |                    | CPu-Morphine/VU0155041 |             |                    | NAc-Morphine/Vehicle |             |                    | NAc-Vehicle/VU0155041 |             |                    | NAc-Morphine/VU0155041 |             |                    | CeA-Morphine/Vehicle |             |                    | CeA-Vehicle/VU0155041 |             |                    | CeA-Morphine/VU0155041 |             |                    |
|--------------|-------------------------------------------------|---------------|----------------------|------|--------------------|-----------------------|-------------|--------------------|------------------------|-------------|--------------------|----------------------|-------------|--------------------|-----------------------|-------------|--------------------|------------------------|-------------|--------------------|----------------------|-------------|--------------------|-----------------------|-------------|--------------------|------------------------|-------------|--------------------|
|              |                                                 |               | FC                   | sem  | Corrected p values | FC                    | sem         | Corrected p values | FC                     | sem         | Corrected p values | FC                   | sem         | Corrected p values | FC                    | sem         | Corrected p values | FC                     | sem         | Corrected p values | FC                   | sem         | Corrected p values | FC                    | sem         | Corrected p values | FC                     | sem         | Corrected p values |
| NM_028755    | cyclic AMP-regulated phosphoprotein, 21         | <i>Arpp21</i> | -1.05                | 0.29 | 0.937              | <b>1.82</b>           | <b>0.17</b> | <b>0.006</b>       | 1.89                   | 0.22        | 0.053              | -1.52                | 0.23        | 0.085              | 1.20                  | 0.15        | 0.241              | <b>1.36</b>            | <b>0.06</b> | <b>0.019</b>       | -1.44                | 0.29        | 0.324              | -1.05                 | 0.19        | 0.842              | 1.08                   | 0.18        | 0.696              |
| NM_009732    | arginine vasopressin                            | <i>Avp</i>    | -1.75                | 0.43 | 0.298              | 1.36                  | 0.43        | 0.676              | <b>1.79</b>            | <b>0.35</b> | <b>0.025</b>       | <b>-2.44</b>         | <b>0.43</b> | <b>0.042</b>       | -1.05                 | 0.42        | 0.908              | 1.25                   | 0.47        | 0.879              | -1.11                | 0.40        | 0.460              | -1.30                 | 0.30        | 0.421              | 1.40                   | 0.32        | 0.432              |
| NM_007540    | brain derived neurotrophic factor               | <i>Bdnf</i>   | -1.76                | 0.42 | 0.241              | -1.08                 | 0.40        | 0.838              | -1.11                  | 0.59        | 0.162              | -1.93                | 0.41        | 0.139              | 8.16                  | 3.20        | 0.185              | 3.23                   | 1.41        | 0.302              | <b>1.66</b>          | <b>0.07</b> | <b>0.031</b>       | 1.39                  | 0.19        | 0.241              | <b>1.79</b>            | <b>0.27</b> | <b>0.048</b>       |
| NM_010076    | dopamine receptor D1A                           | <i>Drd1a</i>  | -1.24                | 0.21 | 0.580              | 1.28                  | 0.17        | 0.707              | <b>1.72</b>            | <b>0.22</b> | <b>0.039</b>       | <b>-1.60</b>         | <b>0.19</b> | <b>0.041</b>       | 1.10                  | 0.13        | 0.831              | -1.23                  | 0.29        | 0.928              | -1.35                | 0.25        | 0.233              | <b>-1.91</b>          | <b>0.32</b> | <b>0.050</b>       | -1.32                  | 0.32        | 0.424              |
| NM_010077    | dopamine receptor D2                            | <i>Drd2</i>   | -1.59                | 0.66 | 0.735              | -1.28                 | 0.22        | 0.336              | -1.03                  | 0.39        | 0.271              | -1.09                | 0.11        | 0.757              | 1.29                  | 0.31        | 0.931              | -1.09                  | 0.28        | 0.878              | <b>-1.69</b>         | <b>0.18</b> | <b>0.029</b>       | -1.63                 | 0.46        | 0.832              | -3.13                  | 0.89        | 0.089              |
| NM_010234    | FBJ osteosarcoma oncogene                       | <i>Fos</i>    | -1.09                | 0.15 | 0.750              | 1.03                  | 0.33        | 0.911              | <b>1.21</b>            | <b>0.26</b> | <b>0.029</b>       | <b>-1.53</b>         | <b>0.20</b> | <b>0.047</b>       | 1.21                  | 0.25        | 0.866              | -1.10                  | 0.26        | 0.801              | 1.23                 | 0.15        | 0.362              | 1.19                  | 0.13        | 0.553              | 1.47                   | 0.26        | 0.781              |
| NM_001013385 | glutamate receptor, metabotropic 4              | <i>Grm4</i>   | -1.29                | 0.36 | 0.196              | 1.63                  | 0.44        | 0.426              | <b>1.79</b>            | <b>0.40</b> | <b>0.039</b>       | -1.43                | 0.30        | 0.182              | 1.63                  | 0.44        | 0.177              | <b>2.10</b>            | <b>0.50</b> | <b>0.018</b>       | 1.02                 | 0.29        | 0.717              | <b>1.61</b>           | <b>0.25</b> | <b>0.049</b>       | -1.28                  | 0.32        | 0.848              |
| NM_010471    | hippocalin                                      | <i>Hpcal</i>  | 1.12                 | 0.28 | 0.843              | <b>1.47</b>           | <b>0.23</b> | <b>0.047</b>       | <b>2.12</b>            | <b>0.38</b> | <b>0.036</b>       | <b>-1.85</b>         | <b>0.31</b> | <b>0.043</b>       | -1.02                 | 0.11        | 0.256              | 1.12                   | 0.19        | 0.889              | -1.58                | 0.39        | 0.736              | -1.26                 | 0.20        | 0.416              | -1.07                  | 0.19        | 0.732              |
| NM_010444    | nuclear receptor subfamily 4, group A, member 1 | <i>Nr4a1</i>  | -2.24                | 0.51 | 0.460              | -1.05                 | 0.32        | 0.777              | 1.21                   | 0.27        | 0.085              | -1.24                | 0.31        | 0.363              | -1.08                 | 0.52        | 0.730              | 1.23                   | 0.28        | 0.981              | 1.05                 | 0.23        | 0.901              | <b>1.40</b>           | <b>0.16</b> | <b>0.050</b>       | 1.13                   | 0.17        | 0.571              |
| NM_011025    | oxytocin                                        | <i>Oxt</i>    | -1.22                | 0.35 | 0.730              | 2.20                  | 0.60        | 0.198              | <b>1.94</b>            | <b>0.42</b> | <b>0.042</b>       | <b>-2.07</b>         | <b>0.45</b> | <b>0.047</b>       | 1.03                  | 0.28        | 0.336              | 3.52                   | 0.99        | 0.146              | -2.53                | 0.55        | 0.056              | -1.36                 | 0.26        | 0.689              | -1.66                  | 0.70        | 0.581              |
| NM_011866    | phosphodiesterase 10A                           | <i>Pde10a</i> | -1.43                | 0.20 | 0.751              | -1.00                 | 0.34        | 0.656              | 1.33                   | 0.36        | 0.394              | -1.24                | 0.23        | 0.230              | -1.04                 | 0.13        | 0.627              | -1.24                  | 0.37        | 0.541              | <b>-2.60</b>         | <b>0.65</b> | <b>0.031</b>       | -1.81                 | 0.63        | 0.682              | -3.27                  | 1.22        | 0.132              |
| NM_009305    | Synaptophysin                                   | <i>Syp</i>    | -1.07                | 0.41 | 0.861              | <b>6.63</b>           | <b>1.46</b> | <b>0.010</b>       | <b>6.68</b>            | <b>1.19</b> | <b>0.029</b>       | -2.00                | 0.57        | 0.220              | <b>4.10</b>           | <b>0.74</b> | <b>0.006</b>       | <b>2.57</b>            | <b>0.25</b> | <b>0.003</b>       | 1.12                 | 0.55        | 0.189              | 1.29                  | 0.24        | 0.472              | <b>4.20</b>            | <b>1.20</b> | <b>0.049</b>       |
